# Supplementary material for: Development of patient-derived xenograft models from a spontaneously immortal low-grade meningioma cell line, KCI-MENG1
Source: Springer Nature journal article supplement (doi:10.1186/s12967-015-0596-8), 2015-07-14
Supplement: MOESM1 [file 9767046]

**Additional Table 1: Cancer Gene List used for aCGH data filtering**

|          |          |         |         |           |          |        |          |          |         |          |         |
|----------|----------|---------|---------|-----------|----------|--------|----------|----------|---------|----------|---------|
| ABI1     | BRCA1    | CDX2    | ELF4    | FLCN      | HOXD13   | MAFB   | MYCN     | PDCD1LG2 | RBM15   | SS18L1   | TPM3    |
| ABL1     | BRCA2    | CEBPA   | ELK4    | FLI1      | HRAS     | MALAT1 | MYD88    | PDE4DIP  | RECQL4  | SSX1     | TPM4    |
| ABL2     | BRD3     | CEP1    | ELL     | FLT3      | HSPCA    | MALT1  | MYH11    | PDGFB    | REL     | SSX2     | TPR     |
| ACSL3    | BRD4     | CEP76   | ELN     | FNBP1     | HSPCB    | MAML2  | MYH9     | PDGFRA   | RET     | SSX4     | TPX2    |
| AFF4     | BRIP1    | CHCHD7  | EML4    | FOXA1     | IDH1     | MAP2K1 | MYOCD    | PDGFRB   | RHEB    | STAG2    | TRA     |
| AKAP9    | BTG1     | CHD8    | EP300   | FOXL2     | IDH2     | MAP2K2 | MYST4    | PER1     | RHOA    | STAT3    | TRAF7   |
| AKT1     | BUB1B    | CHEK2   | EPS15   | FOXO1A    | IGH      | MAP2K4 | NACA     | PHF6     | RNF213  | STAT5B   | TRB     |
| AKT2     | C12orf9  | CHIC2   | ERBB2   | FOXO3A    | IGK      | MAP4K3 | NBS1     | PHOX2B   | RNF43   | STIL     | TRD     |
| ALDH2    | C15orf21 | CHN1    | ERC1    | FOXP1     | IGL      | MAX    | NCKIPSD  | PICALM   | ROS1    | STK11    | TRIM23  |
| ALK      | C15orf55 | CIC     | ERCC2   | FSTL3     | IKZF1    | MBD1   | NCOA1    | PIK3CA   | RPL10   | STL      | TRIM27  |
| ALPK2    | C15orf65 | CIITA   | ERCC3   | FUBP1     | IL2      | MDM2   | NCOA2    | PIK3R1   | RPL22   | STX2     | TRIM33  |
| AMER1    | C16orf75 | CLP1    | ERCC4   | FUS       | IL21R    | MDM4   | NCOA4    | PIM1     | RPL5    | SUFU     | TRIP11  |
| APC      | C2orf44  | CLTC    | ERCC5   | FVT1      | IL6ST    | MDS1   | NDRG1    | PLA2G10  | RPL5    | SUZ12    | TRRAP   |
| AR       | CACNA1D  | CLTCL1  | ERG     | GAS7      | IL7R     | MDS2   | NF1      | PLAG1    | RPN1    | SYK      | TSC1    |
| ARHGAP26 | CALR     | CMKOR1  | ETV1    | GATA1     | IRF4     | MECT1  | NF2      | PML      | RUNDC2A | TAF15    | TSC2    |
| ARHGEF12 | CAMTA1   | CNOT3   | ETV4    | GATA2     | IRF6     | MED12  | NFE2L2   | PMS1     | RUNX1   | TAL1     | TSHR    |
| ARHH     | CANT1    | COL1A1  | ETV5    | GATA3     | ITK      | MEN1   | NFIB     | PMS2     | RUNXBP2 | TAL2     | TTL     |
| ARID1A   | CARD11   | COPEB   | ETV6    | GMPS      | JAK1     | MET    | NFKB2    | PMX1     | RXRA    | TAP1     | U2AF1   |
| ARID2    | CARS     | COX6C   | EVI1    | GNA11     | JAK2     | MGA    | NIN      | PNUTL1   | SBDS    | TBL1XR1  | UBR5    |
| ARNT     | CASC5    | CREB1   | EWSR1   | GNAQ      | JAK3     | MITF   | NKX2-1   | POT1     | SDC4    | TCEA1    | USP6    |
| ASPCR1   | CASP8    | CREB3L1 | EXT1    | GNAS      | JAZF1    | MKL1   | NONO     | POU2AF1  | SDHAF2  | TCF1     | VHL     |
| ASXL1    | CBFA2T1  | CREB3L2 | EXT2    | GOLGA5    | JUN      | MLF1   | NOTCH1   | POU5F1   | SDHB    | TCF12    | VTI1A   |
| ATF1     | CBFA2T3  | CREBBP  | EZH1    | GOPC      | KCNJ5    | MLH1   | NOTCH2   | PPARG    | SDHC    | TCF3     | WAS     |
| ATIC     | CBFB     | CRLF2   | EZH2    | GPC3      | KDM5A    | MLL    | NPM1     | PPP2R1A  | SDHD    | TCF7L2   | WHSC1   |
| ATM      | CBL      | CRTC3   | EZR     | GPHN      | KDM5C    | MLL2   | NR4A3    | PRCC     | SEPT6   | TCL1A    | WHSC1L1 |
| ATP1A1   | CBLB     | CSF3R   | FACL6   | GRLF1     | KDM6A    | MLL3   | NRAS     | PRDM1    | SET     | TCL6     | WIF1    |
| ATP2B3   | CBLC     | CTNNB1  | FAM22A  | H3F3A     | KDR      | MLLT1  | NSD1     | PRDM16   | SETBP1  | TERT     | WRN     |
| ATRX     | CCDC6    | CYLD    | FAM22B  | H3F3B     | KIAA1549 | MLLT10 | NT5C2    | PRF1     | SETD2   | TET1     | WT1     |
| AURKA    | CCNB1IP1 | D10S170 | FAM46C  | HERPUD1   | KIF5B    | MLLT11 | NTRK1    | PRKAR1A  | SETDB1  | TET2     | WWTR1   |
| AXIN1    | CCND1    | DAXX    | FANCA   | HEY1      | KIT      | MLLT2  | NTRK3    | PSIP2    | SF3B1   | TFE3     | XPA     |
| BAP1     | CCND2    | DDB2    | FANCC   | HIP1      | KLF4     | MLLT3  | NUMA1    | PTCH     | SFPQ    | TFEB     | XPC     |
| BCL10    | CCND3    | DDIT3   | FANCD2  | HIST1H3B  | KLK2     | MLLT4  | NUP214   | PTCH1    | SFRS3   | TFG      | XPO1    |
| BCL11A   | CCNE1    | DDR2    | FANCE   | HIST1H4E  | KRAS     | MLLT6  | NUP98    | PTEN     | SH2B3   | TFPT     | YWHAE   |
| BCL11B   | CD1D     | DDX10   | FANCF   | HIST1H4I  | KTN1     | MLLT7  | OLIG2    | PTPN11   | SH3GL1  | TFRC     | ZNF145  |
| BCL2     | CD274    | DDX5    | FANCG   | HLA-B     | LAF4     | MN1    | OMD      | PTPRC    | SLC34A2 | THRAP3   | ZNF198  |
| BCL3     | CD74     | DDX6    | FBXO11  | HLF       | LASP1    | MPL    | P2RY8    | QKI      | SLC45A3 | TIF1     | ZNF278  |
| BCL5     | CD79A    | DEK     | FBXW7   | HLXB9     | LCK      | MSF    | PAFAH1B2 | RABEP1   | SMARCA4 | TLX1     | ZNF331  |
| BCL6     | CD79B    | DICER1  | FCGR2B  | HMGA1     | LCP1     | MSH2   | PALB2    | RAC1     | SMARCB1 | TLX3     | ZNF384  |
| BCL7A    | CDC73    | DNER    | FCRL4   | HMGA2     | LHFP     | MSH6   | PAX3     | RAD21    | SMARCE1 | TMPRSS2  | ZNF521  |
| BCL9     | CDH1     | DNM2    | FEV     | HNRNPA2B1 | LIFR     | MSI2   | PAX5     | RAD21    | SMO     | TNF      | ZNF750  |
| BCLAF1   | CDH11    | DNMT3A  | FGFR1   | HOOK3     | LMO1     | MSN    | PAX7     | RAD51L1  | SOCS1   | TNFAIP3  | ZNF9    |
| BCOR     | CDK12    | DUX4    | FGFR1OP | HOXA11    | LMO2     | MTCP1  | PAX8     | RAF1     | SOS1    | TNFRSF14 | ZRANB3  |
| BCR      | CDK4     | EBF1    | FGFR2   | HOXA13    | LPP      | MUC1   | PBRM1    | RALGDS   | SOX2    | TNFRSF17 | ZRSR2   |
| BIRC3    | CDK6     | ECT2L   | FGFR3   | HOXA9     | LRIG3    | MUTYH  | PBX1     | RANBP17  | SPECC1  | TNFRSF6  |         |
| BLM      | CDKN2A   | EGFR    | FH      | HOXC11    | LYL1     | MYB    | PCBP1    | RAP1GDS1 | SRGAP3  | TOP1     |         |
| BMPR1A   | CDKN2AIP | EIF4A2  | FHIT    | HOXC13    | MADH4    | MYC    | PCM1     | RARA     | SRSF2   | TP53     |         |
| BRAF     | CDKN2C   | ELF3    | FIP1L1  | HOXD11    | MAF      | MYCL1  | PCSK7    | RB1      | SS18    | TP53BP1  |         |
