# Supplementary material for: Development of patient-derived xenograft models from a spontaneously immortal low-grade meningioma cell line, KCI-MENG1
Source: Springer Nature journal article supplement (doi:10.1186/s12967-015-0596-8), 2015-07-14
Supplement: MOESM2 [file 9767046]

**ADDITIONAL TABLE 2: aCGH data of Low- and High-Passage KCI-MENG1 Cells**

| Chr   | CytoBand       | GeneID  | Gene name                                                                                                       | Amplification P6 | Deletion P6 | Amplification P86 | Deletion P86 |
|-------|----------------|---------|-----------------------------------------------------------------------------------------------------------------|------------------|-------------|-------------------|--------------|
| chr01 | q21.1 - q44    | ABL2    | v-abl Abelson murine leukemia viral oncogene homolog 2 (arg, Abelson-related gene)                              |                  |             | 0.890879          |              |
| chr01 | q21.1 - q44    | ARNT    | aryl hydrocarbon receptor nuclear translocator                                                                  |                  |             | 0.890879          |              |
| chr01 | q21.1 - q44    | BCL9    | B-cell CLL/lymphoma 9                                                                                           |                  |             | 0.890879          |              |
| chr01 | q21.1 - q44    | CDC73   | cell division cycle 73, Paf1/RNA polymerase II complex component, homolog (S. cerevisiae)                       |                  |             | 0.890879          |              |
| chr01 | q21.1 - q44    | ELK4    | ELK4, ETS-domain protein (SRF accessory protein 1)                                                              |                  |             | 0.890879          |              |
| chr01 | q21.1 - q44    | FCGR2B  | Fc fragment of IgG, low affinity IIb, receptor (CD32) Fc fragment of IgG, low affinity IIc, receptor for (CD32) |                  |             | 0.890879          |              |
| chr01 | q21.1 - q44    | FCRL4   | Fc receptor-like 4                                                                                              |                  |             | 0.890879          |              |
| chr01 | q21.1 - q44    | FH      | fumarate hydratase                                                                                              |                  |             | 0.890879          |              |
| chr01 | q21.1 - q44    | H3F3A   | H3 histone, family 3B (H3.3B) H3 histone, family 3A pseudogene                                                  |                  |             | 0.890879          |              |
| chr01 | q21.1 - q44    | MDM4    | Mdm4 p53 binding protein homolog (mouse)                                                                        |                  |             | 0.890879          |              |
| chr01 | q21.1 - q44    | MLLT11  | myeloid/lymphoid or mixed-lineage leukemia (trithorax homolog, Drosophila) translocated to, 11                  |                  |             | 0.890879          |              |
| chr01 | q21.1 - q44    | MUC1    | mucin 1, cell surface associated                                                                                |                  |             | 0.890879          |              |
| chr01 | q21.1 - q44    | NTRK1   | neurotrophic tyrosine kinase, receptor, type 1                                                                  |                  |             | 0.890879          |              |
| chr01 | q21.1 - q44    | PBX1    | pre-B-cell leukemia homeobox 1                                                                                  |                  |             | 0.890879          |              |
| chr01 | q21.1 - q44    | PDE4DIP | programmed cell death 1 ligand 2                                                                                |                  |             | 0.890879          |              |
| chr01 | q21.1 - q44    | PRCC    | papillary renal cell carcinoma (translocation-associated)                                                       |                  |             | 0.890879          |              |
| chr01 | q21.1 - q44    | PRRX1   | paired related homeobox 1                                                                                       |                  |             | 0.890879          |              |
| chr01 | q21.1 - q44    | SDHC    | succinate dehydrogenase complex, subunit C, integral membrane protein, 15kDa                                    |                  |             | 0.890879          |              |
| chr01 | q21.1 - q44    | SLC45A3 | splicing factor proline/glutamine-rich (polypyrimidine tract binding protein associated)                        |                  |             | 0.890879          |              |
| chr01 | q21.1 - q44    | TPM3    | tropomyosin 3                                                                                                   |                  |             | 0.890879          |              |
| chr01 | q21.1 - q44    | TPR     | translocated promoter region (to activated MET oncogene)                                                        |                  |             | 0.890879          |              |
| chr01 | p22.1 - p11.2  | FAM46C  | family with sequence similarity 46, member C                                                                    |                  |             | 0.817825          |              |
| chr01 | p22.1 - p11.2  | NOTCH2  | Notch homolog 2 (Drosophila)                                                                                    |                  |             | 0.817825          |              |
| chr01 | p22.1 - p11.2  | NRAS    | neuroblastoma RAS viral (v-ras) oncogene homolog                                                                |                  |             | 0.817825          |              |
| chr01 | p22.1 - p11.2  | TRIM33  | tripartite motif-containing 33                                                                                  |                  |             | 0.817825          |              |
| chr01 | p36.33 - p11.2 | ARID1A  | AT rich interactive domain 1A (SWI-like)                                                                        |                  |             | 0.598554          |              |
| chr01 | p36.33 - p11.2 | BCL10   | B-cell CLL/lymphoma 10 hypothetical LOC646626                                                                   |                  |             | 0.598554          |              |
| chr01 | p36.33 - p11.2 | CAMTA1  | calmodulin binding transcription activator 1                                                                    |                  |             | 0.598554          |              |
| chr01 | p36.33 - p11.2 | CDKN2C  | cyclin-dependent kinase inhibitor 2C (p18, inhibits CDK4)                                                       |                  |             | 0.598554          |              |
| chr01 | p36.33 - p11.2 | EPS15   | epidermal growth factor receptor pathway substrate 15                                                           |                  |             | 0.598554          |              |
| chr01 | p36.33 - p11.2 | FAM46C  | family with sequence similarity 46, member C                                                                    |                  |             | 0.598554          |              |
| chr01 | p36.33 - p11.2 | FUBP1   | far upstream element (FUSE) binding protein 1                                                                   |                  |             | 0.598554          |              |
| chr01 | p36.33 - p11.2 | JAK1    | Janus kinase 1                                                                                                  |                  |             | 0.598554          |              |
| chr01 | p36.33 - p11.2 | JUN     | jun oncogene                                                                                                    |                  |             | 0.598554          |              |
| chr01 | p36.33 - p11.2 | LCK     | lymphocyte-specific protein tyrosine kinase                                                                     |                  |             | 0.598554          |              |
| chr01 | p36.33 - p11.2 | MDS2    | myelodysplastic syndrome 2 translocation associated                                                             |                  |             | 0.598554          |              |
| chr01 | p36.33 - p11.2 | MPL     | myeloproliferative leukemia virus oncogene                                                                      |                  |             | 0.598554          |              |

**ADDITIONAL TABLE 2: aCGH data of Low- and High-Passage KCI-MENG1 Cells**

| Chr   | CytoBand       | GeneID   | Gene name                                                                                | Amplification P6 | Deletion P6 | Amplification P86 | Deletion P86 |
|-------|----------------|----------|------------------------------------------------------------------------------------------|------------------|-------------|-------------------|--------------|
| chr01 | p36.33 - p11.2 | MUTYH    | mutY homolog (E. coli)                                                                   |                  |             | 0.598554          |              |
| chr01 | p36.33 - p11.2 | MYCL1    | v-myc myelocytomatosis viral oncogene homolog 1, lung carcinoma derived (avian)          |                  |             | 0.598554          |              |
| chr01 | p36.33 - p11.2 | NOTCH2   | Notch homolog 2 (Drosophila)                                                             |                  |             | 0.598554          |              |
| chr01 | p36.33 - p11.2 | NRAS     | neuroblastoma RAS viral (v-ras) oncogene homolog                                         |                  |             | 0.598554          |              |
| chr01 | p36.33 - p11.2 | PAX7     | paired box 7                                                                             |                  |             | 0.598554          |              |
| chr01 | p36.33 - p11.2 | PRDM16   | PR domain containing 16                                                                  |                  |             | 0.598554          |              |
| chr01 | p36.33 - p11.2 | RBM15    | RNA binding motif protein 15                                                             |                  |             | 0.598554          |              |
| chr01 | p36.33 - p11.2 | RBM15    | RNA binding motif protein 15                                                             |                  |             | 0.598554          |              |
| chr01 | p36.33 - p11.2 | RPL22    | ribosomal protein L22 pseudogene 11 ribosomal protein L22                                |                  |             | 0.598554          |              |
| chr01 | p36.33 - p11.2 | SDHB     | succinate dehydrogenase complex, subunit B, iron sulfur (lp)                             |                  |             | 0.598554          |              |
| chr01 | p36.33 - p11.2 | SFPQ     | splicing factor proline/glutamine-rich (polypyrimidine tract binding protein associated) |                  |             | 0.598554          |              |
| chr01 | p36.33 - p11.2 | STIL     | SCL/TAL1 interrupting locus                                                              |                  |             | 0.598554          |              |
| chr01 | p36.33 - p11.2 | TAL1     | T-cell acute lymphocytic leukemia 1                                                      |                  |             | 0.598554          |              |
| chr01 | p36.33 - p11.2 | THRAP3   | thyroid hormone receptor associated protein 3                                            |                  |             | 0.598554          |              |
| chr01 | p36.33 - p11.2 | TNFRSF14 | tumor necrosis factor receptor superfamily, member 14 (herpesvirus entry mediator)       |                  |             | 0.598554          |              |
| chr01 | p36.33 - p11.2 | TRIM33   | tripartite motif-containing 33                                                           |                  |             | 0.598554          |              |
| chr01 | p36.33 - p32.3 | ARID1A   | AT rich interactive domain 1A (SWI-like)                                                 |                  |             | 0.51241           |              |
| chr01 | p36.33 - p32.3 | CAMTA1   | calmodulin binding transcription activator 1                                             |                  |             | 0.51241           |              |
| chr01 | p36.33 - p32.3 | CDKN2C   | cyclin-dependent kinase inhibitor 2C (p18, inhibits CDK4)                                |                  |             | 0.51241           |              |
| chr01 | p36.33 - p32.3 | LCK      | lymphocyte-specific protein tyrosine kinase                                              |                  |             | 0.51241           |              |
| chr01 | p36.33 - p32.3 | MDS2     | myelodysplastic syndrome 2 translocation associated                                      |                  |             | 0.51241           |              |
| chr01 | p36.33 - p32.3 | MPL      | myeloproliferative leukemia virus oncogene                                               |                  |             | 0.51241           |              |
| chr01 | p36.33 - p32.3 | MUTYH    | mutY homolog (E. coli)                                                                   |                  |             | 0.51241           |              |
| chr01 | p36.33 - p32.3 | MYCL1    | v-myc myelocytomatosis viral oncogene homolog 1, lung carcinoma derived (avian)          |                  |             | 0.51241           |              |
| chr01 | p36.33 - p32.3 | PAX7     | paired box 7                                                                             |                  |             | 0.51241           |              |
| chr01 | p36.33 - p32.3 | PRDM16   | PR domain containing 16                                                                  |                  |             | 0.51241           |              |
| chr01 | p36.33 - p32.3 | RPL22    | ribosomal protein L22 pseudogene 11 ribosomal protein L22                                |                  |             | 0.51241           |              |
| chr01 | p36.33 - p32.3 | SDHB     | succinate dehydrogenase complex, subunit B, iron sulfur (lp)                             |                  |             | 0.51241           |              |
| chr01 | p36.33 - p32.3 | SFPQ     | splicing factor proline/glutamine-rich (polypyrimidine tract binding protein associated) |                  |             | 0.51241           |              |
| chr01 | p36.33 - p32.3 | STIL     | SCL/TAL1 interrupting locus                                                              |                  |             | 0.51241           |              |
| chr01 | p36.33 - p32.3 | TAL1     | T-cell acute lymphocytic leukemia 1                                                      |                  |             | 0.51241           |              |
| chr01 | p36.33 - p32.3 | THRAP3   | thyroid hormone receptor associated protein 3                                            |                  |             | 0.51241           |              |
| chr01 | p36.33 - p32.3 | TNFRSF14 | tumor necrosis factor receptor superfamily, member 14 (herpesvirus entry mediator)       |                  |             | 0.51241           |              |
| chr02 | p22.1 - p16.1  | EML4     | echinoderm microtubule associated protein like 4                                         | 0.324536         |             | 0.986305          |              |
| chr02 | p22.1 - p16.1  | FBXO11   | F-box protein 11                                                                         | 0.324536         |             | 0.986305          |              |
| chr02 | p22.1 - p16.1  | MSH2     | mutS homolog 2, colon cancer, nonpolyposis type 1 (E. coli)                              | 0.324536         |             | 0.986305          |              |
| chr02 | p22.1 - p16.1  | MSH6     | mutS homolog 6 (E. coli)                                                                 | 0.324536         |             | 0.986305          |              |

**ADDITIONAL TABLE 2: aCGH data of Low- and High-Passage KCI-MENG1 Cells**

| Chr   | CytoBand      | GeneID  | Gene name                                                                                                                           | Amplification P6 | Deletion P6 | Amplification P86 | Deletion P86 |
|-------|---------------|---------|-------------------------------------------------------------------------------------------------------------------------------------|------------------|-------------|-------------------|--------------|
| chr02 | q11.1 - q14.3 | AFF3    | AF4/FMR2 family, member 3                                                                                                           |                  |             | 0.898312          |              |
| chr02 | q11.1 - q14.3 | ERCC3   | excision repair cross-complementing rodent repair deficiency, complementation group 3 (xeroderma pigmentosum group B complementing) |                  |             | 0.898312          |              |
| chr02 | q11.1 - q14.3 | PAX8    | paired box 8                                                                                                                        |                  |             | 0.898312          |              |
| chr02 | q11.1 - q14.3 | TTL     | tubulin tyrosine ligase                                                                                                             |                  |             | 0.898312          |              |
| chr02 | p22.2 - p11.1 | BCL11A  | B-cell CLL/lymphoma 11A (zinc finger protein)                                                                                       |                  |             | 0.70192           |              |
| chr02 | p22.2 - p11.1 | EML4    | echinoderm microtubule associated protein like 4                                                                                    |                  |             | 0.70192           |              |
| chr02 | p22.2 - p11.1 | FBXO11  | F-box protein 11                                                                                                                    |                  |             | 0.70192           |              |
| chr02 | p22.2 - p11.1 | MSH2    | mutS homolog 2, colon cancer, nonpolyposis type 1 (E. coli)                                                                         |                  |             | 0.70192           |              |
| chr02 | p22.2 - p11.1 | MSH6    | mutS homolog 6 (E. coli)                                                                                                            |                  |             | 0.70192           |              |
| chr02 | p22.2 - p11.1 | REL     | v-rel reticuloendotheliosis viral oncogene homolog (avian)                                                                          |                  |             | 0.70192           |              |
| chr02 | p22.2 - p11.1 | XPO1    | exportin 1 (CRM1 homolog, yeast)                                                                                                    |                  |             | 0.70192           |              |
| chr02 | p16.1 - p11.2 | BCL11A  | B-cell CLL/lymphoma 11A (zinc finger protein)                                                                                       |                  |             | 0.533694          |              |
| chr02 | p16.1 - p11.2 | REL     | v-rel reticuloendotheliosis viral oncogene homolog (avian)                                                                          |                  |             | 0.533694          |              |
| chr02 | p16.1 - p11.2 | XPO1    | exportin 1 (CRM1 homolog, yeast)                                                                                                    |                  |             | 0.533694          |              |
| chr03 | q26.1 - q26.2 | MECOM   | ecotropic viral integration site 1                                                                                                  | 0.702415         |             | 1.47986           |              |
| chr03 | q11.1 - q26.2 | CBLB    | Cas-Br-M (murine) ecotropic retroviral transforming sequence b                                                                      |                  |             | 0.933628          |              |
| chr03 | q11.1 - q26.2 | CNBP    | CCHC-type zinc finger, nucleic acid binding protein                                                                                 |                  |             | 0.933628          |              |
| chr03 | q11.1 - q26.2 | FOXL2   | forkhead box L2                                                                                                                     |                  |             | 0.933628          |              |
| chr03 | q11.1 - q26.2 | GATA2   | GATA binding protein 2                                                                                                              |                  |             | 0.933628          |              |
| chr03 | q11.1 - q26.2 | GMPS    | guanine monphosphate synthetase                                                                                                     |                  |             | 0.933628          |              |
| chr03 | q11.1 - q26.2 | MECOM   | ecotropic viral integration site 1                                                                                                  |                  |             | 0.933628          |              |
| chr03 | q11.1 - q26.2 | MLF1    | myeloid leukemia factor 1                                                                                                           |                  |             | 0.933628          |              |
| chr03 | q11.1 - q26.2 | RPN1    | ribophorin I                                                                                                                        |                  |             | 0.933628          |              |
| chr03 | q11.1 - q26.2 | TFG     | TRK-fused gene                                                                                                                      |                  |             | 0.933628          |              |
| chr03 | q11.1 - q26.2 | WWTR1   | WW domain containing transcription regulator 1                                                                                      |                  |             | 0.933628          |              |
| chr03 | p26.3 - p11.1 | BAP1    | BRCA1 associated protein-1 (ubiquitin carboxy-terminal hydrolase)                                                                   |                  |             | 0.588208          |              |
| chr03 | p26.3 - p11.1 | CTNNB1  | catenin (cadherin-associated protein), beta 1, 88kDa                                                                                |                  |             | 0.588208          |              |
| chr03 | p26.3 - p11.1 | FANCD2  | Fanconi anemia, complementation group D2                                                                                            |                  |             | 0.588208          |              |
| chr03 | p26.3 - p11.1 | FHIT    | fragile histidine triad gene                                                                                                        |                  |             | 0.588208          |              |
| chr03 | p26.3 - p11.1 | FOXP1   | forkhead box P1                                                                                                                     |                  |             | 0.588208          |              |
| chr03 | p26.3 - p11.1 | MITF    | microphthalmia-associated transcription factor                                                                                      |                  |             | 0.588208          |              |
| chr03 | p26.3 - p11.1 | MLH1    | mutL homolog 1, colon cancer, nonpolyposis type 2 (E. coli)                                                                         |                  |             | 0.588208          |              |
| chr03 | p26.3 - p11.1 | MYD88   | myeloid differentiation primary response gene (88)                                                                                  |                  |             | 0.588208          |              |
| chr03 | p26.3 - p11.1 | NCKIPSD | nascent polypeptide-associated complex alpha subunit                                                                                |                  |             | 0.588208          |              |
| chr03 | p26.3 - p11.1 | PBRM1   | polybromo 1                                                                                                                         |                  |             | 0.588208          |              |
| chr03 | p26.3 - p11.1 | PPARG   | peroxisome proliferator-activated receptor gamma                                                                                    |                  |             | 0.588208          |              |
| chr03 | p26.3 - p11.1 | RAF1    | v-raf-1 murine leukemia viral oncogene homolog 1                                                                                    |                  |             | 0.588208          |              |
| chr03 | p26.3 - p11.1 | SETD2   | SET domain containing 2                                                                                                             |                  |             | 0.588208          |              |
| chr03 | p26.3 - p11.1 | SRGAP3  | SLIT-ROBO Rho GTPase activating protein 3                                                                                           |                  |             | 0.588208          |              |
| chr03 | p26.3 - p11.1 | VHL     | von Hippel-Lindau tumor suppressor                                                                                                  |                  |             | 0.588208          |              |
| chr03 | p26.3 - p11.1 | XPC     | xeroderma pigmentosum, complementation group C                                                                                      |                  |             | 0.588208          |              |

**ADDITIONAL TABLE 2: aCGH data of Low- and High-Passage KCI-MENG1 Cells**

| Chr   | CytoBand       | GeneID   | Gene name                                                                                           | Amplification P6 | Deletion P6 | Amplification P86 | Deletion P86 |
|-------|----------------|----------|-----------------------------------------------------------------------------------------------------|------------------|-------------|-------------------|--------------|
| chr03 | p14.2          | FHIT     | fragile histidine triad gene                                                                        |                  | -0.614211   |                   | -0.501957    |
| chr03 | q12.2 - q26.2  | CBLB     | Cas-Br-M (murine) ecotropic retroviral transforming sequence b                                      | 0.308483         |             |                   |              |
| chr03 | q12.2 - q26.2  | CNBP     | CCHC-type zinc finger, nucleic acid binding protein                                                 | 0.308483         |             |                   |              |
| chr03 | q12.2 - q26.2  | FOXL2    | forkhead box L2                                                                                     | 0.308483         |             |                   |              |
| chr03 | q12.2 - q26.2  | GATA2    | GATA binding protein 2                                                                              | 0.308483         |             |                   |              |
| chr03 | q12.2 - q26.2  | GMPS     | guanine monphosphate synthetase                                                                     | 0.308483         |             |                   |              |
| chr03 | q12.2 - q26.2  | MECOM    | ecotropic viral integration site 1                                                                  | 0.308483         |             |                   |              |
| chr03 | q12.2 - q26.2  | MLF1     | myeloid leukemia factor 1                                                                           | 0.308483         |             |                   |              |
| chr03 | q12.2 - q26.2  | RPN1     | ribophorin I                                                                                        | 0.308483         |             |                   |              |
| chr03 | q12.2 - q26.2  | TFG      | TRK-fused gene                                                                                      | 0.308483         |             |                   |              |
| chr03 | q12.2 - q26.2  | WWTR1    | WW domain containing transcription regulator 1                                                      | 0.308483         |             |                   |              |
| chr05 | p15.33 - p11   | IL7R     | interleukin 7 receptor                                                                              | 1.213931         |             | 2.050158          |              |
| chr05 | p15.33 - p11   | LIFR     | leukemia inhibitory factor receptor alpha                                                           | 1.213931         |             | 2.050158          |              |
| chr05 | q33.2 - q35.2  | EBF1     | early B-cell factor 1                                                                               |                  |             | 0.905554          |              |
| chr05 | q33.2 - q35.2  | ITK      | IL2-inducible T-cell kinase                                                                         |                  |             | 0.905554          |              |
| chr05 | q33.2 - q35.2  | NPM1     | nucleophosmin 1 (nucleolar phosphoprotein B23, numatrin)<br>pseudogene 21 hypothetical LOC100131044 |                  |             | 0.905554          |              |
| chr05 | q33.2 - q35.2  | RANBP17  | ral guanine nucleotide dissociation stimulator                                                      |                  |             | 0.905554          |              |
| chr05 | q33.2 - q35.2  | TLX3     | T-cell leukemia homeobox 3                                                                          |                  |             | 0.905554          |              |
| chr05 | q11.1 - q35.3  | ACSL6    | acyl-CoA synthetase long-chain family member 6                                                      |                  |             | 0.588956          |              |
| chr05 | q11.1 - q35.3  | AFF4     | AF4/FMR2 family, member 4                                                                           |                  |             | 0.588956          |              |
| chr05 | q11.1 - q35.3  | APC      | adenomatous polyposis coli                                                                          |                  |             | 0.588956          |              |
| chr05 | q11.1 - q35.3  | ARHGAP26 | Rho GTPase activating protein 26                                                                    |                  |             | 0.588956          |              |
| chr05 | q11.1 - q35.3  | CD74     | CD74 molecule, major histocompatibility complex, class II invariant chain                           |                  |             | 0.588956          |              |
| chr05 | q11.1 - q35.3  | EBF1     | early B-cell factor 1                                                                               |                  |             | 0.588956          |              |
| chr05 | q11.1 - q35.3  | IL6ST    | interleukin 6 signal transducer (gp130, oncostatin M receptor)                                      |                  |             | 0.588956          |              |
| chr05 | q11.1 - q35.3  | ITK      | IL2-inducible T-cell kinase                                                                         |                  |             | 0.588956          |              |
| chr05 | q11.1 - q35.3  | NPM1     | nucleophosmin 1 (nucleolar phosphoprotein B23, numatrin)<br>pseudogene 21 hypothetical LOC100131044 |                  |             | 0.588956          |              |
| chr05 | q11.1 - q35.3  | NSD1     | nuclear receptor binding SET domain protein 1                                                       |                  |             | 0.588956          |              |
| chr05 | q11.1 - q35.3  | PDGFRB   | platelet-derived growth factor receptor, beta polypeptide                                           |                  |             | 0.588956          |              |
| chr05 | q11.1 - q35.3  | PIK3R1   | phosphoinositide-3-kinase, regulatory subunit 1 (alpha)                                             |                  |             | 0.588956          |              |
| chr05 | q11.1 - q35.3  | RANBP17  | ral guanine nucleotide dissociation stimulator                                                      |                  |             | 0.588956          |              |
| chr05 | q11.1 - q35.3  | TLX3     | T-cell leukemia homeobox 3                                                                          |                  |             | 0.588956          |              |
| chr05 | q21.3 - q32    | ACSL6    | acyl-CoA synthetase long-chain family member 6                                                      |                  |             | 0.521088          |              |
| chr05 | q21.3 - q32    | AFF4     | AF4/FMR2 family, member 4                                                                           |                  |             | 0.521088          |              |
| chr05 | q21.3 - q32    | APC      | adenomatous polyposis coli                                                                          |                  |             | 0.521088          |              |
| chr05 | q21.3 - q32    | ARHGAP26 | Rho GTPase activating protein 26                                                                    |                  |             | 0.521088          |              |
| chr06 | q22.1 - q22.31 | GOPC     | golgi associated PDZ and coiled-coil motif containing                                               |                  |             | 0.585527          |              |
| chr06 | q22.1 - q22.31 | ROS1     | c-ros oncogene 1 , receptor tyrosine kinase                                                         |                  |             | 0.585527          |              |
| chr06 | p25.3 - p11.1  | CCND3    | cyclin D3                                                                                           |                  |             | 0.53958           |              |
| chr06 | p25.3 - p11.1  | DAXX     | death-domain associated protein                                                                     |                  |             | 0.53958           |              |

**ADDITIONAL TABLE 2: aCGH data of Low- and High-Passage KCI-MENG1 Cells**

| Chr   | CytoBand       | GeneID    | Gene name                                                                                                                                                                                                                                                                                                                        | Amplification P6 | Deletion P6 | Amplification P86 | Deletion P86 |
|-------|----------------|-----------|----------------------------------------------------------------------------------------------------------------------------------------------------------------------------------------------------------------------------------------------------------------------------------------------------------------------------------|------------------|-------------|-------------------|--------------|
| chr06 | p25.3 - p11.1  | DEK       | DEK oncogene                                                                                                                                                                                                                                                                                                                     |                  |             | 0.53958           |              |
| chr06 | p25.3 - p11.1  | FANCE     | Fanconi anemia, complementation group E                                                                                                                                                                                                                                                                                          |                  |             | 0.53958           |              |
| chr06 | p25.3 - p11.1  | HIST1H4I  | histone cluster 1, H4l histone cluster 4, H4 histone cluster 1, H4h histone cluster 1, H4j histone cluster 1, H4i histone cluster 1, H4d histone cluster 1, H4c histone cluster 1, H4f histone cluster 1, H4e histone cluster 1, H4b histone cluster 1, H4a histone cluster 2, H4a histone cluster 2, H4b histone cluster 1, H4k |                  |             | 0.53958           |              |
| chr06 | p25.3 - p11.1  | HMGA1     | hypothetical LOC100130009 high mobility group AT-hook 1                                                                                                                                                                                                                                                                          |                  |             | 0.53958           |              |
| chr06 | p25.3 - p11.1  | HSP90AB1  | heat shock protein 90kDa alpha (cytosolic), class B member 1                                                                                                                                                                                                                                                                     |                  |             | 0.53958           |              |
| chr06 | p25.3 - p11.1  | IRF4      | interferon regulatory factor 4                                                                                                                                                                                                                                                                                                   |                  |             | 0.53958           |              |
| chr06 | p25.3 - p11.1  | PIM1      | pim-1 oncogene                                                                                                                                                                                                                                                                                                                   |                  |             | 0.53958           |              |
| chr06 | p25.3 - p11.1  | POU5F1    | POU class 5 homeobox 1                                                                                                                                                                                                                                                                                                           |                  |             | 0.53958           |              |
| chr06 | p25.3 - p11.1  | SRSF3     | SLIT-ROBO Rho GTPase activating protein 3                                                                                                                                                                                                                                                                                        |                  |             | 0.53958           |              |
| chr06 | p25.3 - p11.1  | TFEB      | transcription factor EB                                                                                                                                                                                                                                                                                                          |                  |             | 0.53958           |              |
| chr06 | p25.3 - p11.1  | TRIM27    | tripartite motif-containing 27                                                                                                                                                                                                                                                                                                   |                  |             | 0.53958           |              |
| chr06 | q27            | FGFR1OP   | Fc receptor-like 4                                                                                                                                                                                                                                                                                                               |                  |             | 0.473619          |              |
| chr07 | q21.11 - q22.1 | AKAP9     | A kinase (PRKA) anchor protein (yotiao) 9                                                                                                                                                                                                                                                                                        |                  |             | 0.987225          |              |
| chr07 | q21.11 - q22.1 | CDK6      | cyclin-dependent kinase 6                                                                                                                                                                                                                                                                                                        |                  |             | 0.987225          |              |
| chr07 | p22.3 - p11.1  | CARD11    | caspase recruitment domain family, member 11                                                                                                                                                                                                                                                                                     |                  |             | 0.913181          |              |
| chr07 | p22.3 - p11.1  | EGFR      | epidermal growth factor receptor (erythroblastic leukemia viral (v-erb-b) oncogene homolog, avian)                                                                                                                                                                                                                               |                  |             | 0.913181          |              |
| chr07 | p22.3 - p11.1  | ETV1      | ets variant 1                                                                                                                                                                                                                                                                                                                    |                  |             | 0.913181          |              |
| chr07 | p22.3 - p11.1  | HNRNPA2B1 | heterogeneous nuclear ribonucleoprotein A2/B1                                                                                                                                                                                                                                                                                    |                  |             | 0.913181          |              |
| chr07 | p22.3 - p11.1  | HOXA11    | homeobox A11                                                                                                                                                                                                                                                                                                                     |                  |             | 0.913181          |              |
| chr07 | p22.3 - p11.1  | HOXA13    | homeobox A13                                                                                                                                                                                                                                                                                                                     |                  |             | 0.913181          |              |
| chr07 | p22.3 - p11.1  | HOXA9     | homeobox A9                                                                                                                                                                                                                                                                                                                      |                  |             | 0.913181          |              |
| chr07 | p22.3 - p11.1  | IKZF1     | IKAROS family zinc finger 1 (Ikaros)                                                                                                                                                                                                                                                                                             |                  |             | 0.913181          |              |
| chr07 | p22.3 - p11.1  | JAZF1     | JAZF zinc finger 1                                                                                                                                                                                                                                                                                                               |                  |             | 0.913181          |              |
| chr07 | p22.3 - p11.1  | PMS2      | PMS2 postmeiotic segregation increased 2 (S. cerevisiae)                                                                                                                                                                                                                                                                         |                  |             | 0.913181          |              |
| chr07 | q33 - q34      | BRAF      | v-raf murine sarcoma viral oncogene homolog B1                                                                                                                                                                                                                                                                                   |                  |             | 0.887822          |              |
| chr07 | q33 - q34      | CREB3L2   | cAMP responsive element binding protein 3-like 2                                                                                                                                                                                                                                                                                 |                  |             | 0.887822          |              |
| chr07 | q33 - q34      | KIAA1549  | KIAA1549                                                                                                                                                                                                                                                                                                                         |                  |             | 0.887822          |              |
| chr07 | q33 - q34      | TRIM24    | tripartite motif-containing 24                                                                                                                                                                                                                                                                                                   |                  |             | 0.887822          |              |
| chr07 | q11.1 - q36.3  | AKAP9     | A kinase (PRKA) anchor protein (yotiao) 9                                                                                                                                                                                                                                                                                        |                  |             | 0.69742           |              |
| chr07 | q11.1 - q36.3  | BRAF      | v-raf murine sarcoma viral oncogene homolog B1                                                                                                                                                                                                                                                                                   |                  |             | 0.69742           |              |
| chr07 | q11.1 - q36.3  | CDK6      | cyclin-dependent kinase 6                                                                                                                                                                                                                                                                                                        |                  |             | 0.69742           |              |
| chr07 | q11.1 - q36.3  | CREB3L2   | cAMP responsive element binding protein 3-like 2                                                                                                                                                                                                                                                                                 |                  |             | 0.69742           |              |
| chr07 | q11.1 - q36.3  | ELN       | elastin                                                                                                                                                                                                                                                                                                                          |                  |             | 0.69742           |              |
| chr07 | q11.1 - q36.3  | EZH2      | enhancer of zeste homolog 2 (Drosophila)                                                                                                                                                                                                                                                                                         |                  |             | 0.69742           |              |
| chr07 | q11.1 - q36.3  | HIP1      | huntingtin interacting protein 1                                                                                                                                                                                                                                                                                                 |                  |             | 0.69742           |              |
| chr07 | q11.1 - q36.3  | KIAA1549  | KIAA1549                                                                                                                                                                                                                                                                                                                         |                  |             | 0.69742           |              |
| chr07 | q11.1 - q36.3  | MET       | met proto-oncogene (hepatocyte growth factor receptor)                                                                                                                                                                                                                                                                           |                  |             | 0.69742           |              |
| chr07 | q11.1 - q36.3  | MLL3      | myeloid/lymphoid or mixed-lineage leukemia 3                                                                                                                                                                                                                                                                                     |                  |             | 0.69742           |              |

**ADDITIONAL TABLE 2: aCGH data of Low- and High-Passage KCI-MENG1 Cells**

| Chr   | CytoBand        | GeneID   | Gene name                                                                                     | Amplification P6 | Deletion P6 | Amplification P86 | Deletion P86 |
|-------|-----------------|----------|-----------------------------------------------------------------------------------------------|------------------|-------------|-------------------|--------------|
| chr07 | q11.1 - q36.3   | MNX1     | motor neuron and pancreas homeobox 1                                                          |                  |             | 0.69742           |              |
| chr07 | q11.1 - q36.3   | SBDS     | Shwachman-Bodian-Diamond syndrome pseudogene Shwachman-Bodian-Diamond syndrome                |                  |             | 0.69742           |              |
| chr07 | q11.1 - q36.3   | SMO      | smoothened homolog (Drosophila)                                                               |                  |             | 0.69742           |              |
| chr07 | q11.1 - q36.3   | TRIM24   | tripartite motif-containing 24                                                                |                  |             | 0.69742           |              |
| chr07 | q22.1 - q33     | MET      | met proto-oncogene (hepatocyte growth factor receptor)                                        |                  |             | 0.554199          |              |
| chr07 | q22.1 - q33     | SMO      | smoothened homolog (Drosophila)                                                               |                  |             | 0.554199          |              |
| chr07 | q34 - q36.3     | BRAF     | v-raf murine sarcoma viral oncogene homolog B1                                                |                  |             | 0.527353          |              |
| chr07 | q34 - q36.3     | EZH2     | enhancer of zeste homolog 2 (Drosophila)                                                      |                  |             | 0.527353          |              |
| chr07 | q34 - q36.3     | MLL3     | myeloid/lymphoid or mixed-lineage leukemia 3                                                  |                  |             | 0.527353          |              |
| chr07 | q34 - q36.3     | MNX1     | motor neuron and pancreas homeobox 1                                                          |                  |             | 0.527353          |              |
| chr07 | q11.21 - q11.23 | ELN      | elastin                                                                                       |                  |             | 0.515086          |              |
| chr07 | q11.21 - q11.23 | SBDS     | Shwachman-Bodian-Diamond syndrome pseudogene Shwachman-Bodian-Diamond syndrome                |                  |             | 0.515086          |              |
| chr08 | p23.3 - p12     | PCM1     | pericentriolar material 1                                                                     |                  |             | 0.586885          |              |
| chr08 | p23.3 - p12     | WRN      | similar to Werner syndrome protein Werner syndrome, RecQ helicase-like                        |                  |             | 0.586885          |              |
| chr08 | q23.2 - q24.3   | EXT1     | exostoses (multiple) 1                                                                        |                  |             | 0.454983          |              |
| chr08 | q23.2 - q24.3   | MYC      | v-myc myelocytomatosis viral oncogene homolog (avian)                                         |                  |             | 0.454983          |              |
| chr08 | q23.2 - q24.3   | NDRG1    | N-myc downstream regulated 1                                                                  |                  |             | 0.454983          |              |
| chr08 | q23.2 - q24.3   | RECQL4   | RecQ protein-like 4                                                                           |                  |             | 0.454983          |              |
| chr09 | q33.1 - q34.3   | ABL1     | c-abl oncogene 1, receptor tyrosine kinase                                                    |                  |             | 0.870693          |              |
| chr09 | q33.1 - q34.3   | BRD3     | bromodomain containing 3                                                                      |                  |             | 0.870693          |              |
| chr09 | q33.1 - q34.3   | FNBP1    | formin binding protein 1                                                                      |                  |             | 0.870693          |              |
| chr09 | q33.1 - q34.3   | NOTCH1   | Notch homolog 1, translocation-associated (Drosophila)                                        |                  |             | 0.870693          |              |
| chr09 | q33.1 - q34.3   | NUP214   | nucleoporin 214kDa                                                                            |                  |             | 0.870693          |              |
| chr09 | q33.1 - q34.3   | RALGDS   | ral guanine nucleotide dissociation stimulator                                                |                  |             | 0.870693          |              |
| chr09 | q33.1 - q34.3   | SET      | SET nuclear oncogene similar to SET translocation                                             |                  |             | 0.870693          |              |
| chr09 | q33.1 - q34.3   | TSC1     | tuberous sclerosis 1                                                                          |                  |             | 0.870693          |              |
| chr09 | p24.3 - p21.3   | CD274    | CD274 molecule                                                                                |                  |             | 0.555255          |              |
| chr09 | p24.3 - p21.3   | JAK2     | Janus kinase 2                                                                                |                  |             | 0.555255          |              |
| chr09 | p24.3 - p21.3   | MLLT3    | myeloid/lymphoid or mixed-lineage leukemia (trithorax homolog, Drosophila) translocated to, 3 |                  |             | 0.555255          |              |
| chr09 | p24.3 - p21.3   | NFIB     | nuclear factor I/B                                                                            |                  |             | 0.555255          |              |
| chr09 | p24.3 - p21.3   | PDCD1LG2 | programmed cell death 1 ligand 2                                                              |                  |             | 0.555255          |              |
| chr09 | p24.3 - p21.3   | PSIP1    | PC4 and SFRS1 interacting protein 1                                                           |                  |             | 0.555255          |              |
| chr09 | q13 - q22.2     | GNAQ     | guanine nucleotide binding protein (G protein), q polypeptide                                 |                  |             | 0.41749           |              |
| chr10 | q11.21 - q22.2  | MYST4    | MYST histone acetyltransferase (monocytic leukemia) 4                                         | 0.499694         |             | 1.213813          |              |
| chr10 | q11.21 - q22.2  | NCOA4    | nuclear receptor coactivator 4                                                                | 0.499694         |             | 1.213813          |              |
| chr10 | q11.21 - q22.2  | PRF1     | perforin 1 (pore forming protein)                                                             | 0.499694         |             | 1.213813          |              |
| chr10 | q11.21 - q22.2  | TET1     | tet oncogene 1                                                                                | 0.499694         |             | 1.213813          |              |
| chr10 | q25.1 - q25.2   | VTI1A    | vesicle transport through interaction with t-SNAREs homolog 1A (yeast)                        |                  |             | 0.844808          |              |

**ADDITIONAL TABLE 2: aCGH data of Low- and High-Passage KCI-MENG1 Cells**

| Chr   | CytoBand       | GeneID  | Gene name                                                                       | Amplification P6 | Deletion P6 | Amplification P86 | Deletion P86 |
|-------|----------------|---------|---------------------------------------------------------------------------------|------------------|-------------|-------------------|--------------|
| chr10 | q11.21 - q26.3 | BMPRI1A | bone morphogenetic protein receptor, type IA similar to ALK-3                   |                  |             | 0.785939          |              |
| chr10 | q11.21 - q26.3 | FAM22A  | family with sequence similarity 22, member A                                    |                  |             | 0.785939          |              |
| chr10 | q11.21 - q26.3 | FAS     | Fas (TNF receptor superfamily, member 6)                                        |                  |             | 0.785939          |              |
| chr10 | q11.21 - q26.3 | FGFR2   | fibroblast growth factor receptor 2                                             |                  |             | 0.785939          |              |
| chr10 | q11.21 - q26.3 | MYST4   | MYST histone acetyltransferase (monocytic leukemia) 4                           |                  |             | 0.785939          |              |
| chr10 | q11.21 - q26.3 | NCOA4   | nuclear receptor coactivator 4                                                  |                  |             | 0.785939          |              |
| chr10 | q11.21 - q26.3 | NFKB2   | nuclear factor of kappa light polypeptide gene enhancer in B-cells 2 (p49/p100) |                  |             | 0.785939          |              |
| chr10 | q11.21 - q26.3 | PRF1    | perforin 1 (pore forming protein)                                               |                  |             | 0.785939          |              |
| chr10 | q11.21 - q26.3 | PTEN    | phosphatase and tensin homolog phosphatase and tensin homolog pseudogene 1      |                  |             | 0.785939          |              |
| chr10 | q11.21 - q26.3 | RET     | ret proto-oncogene                                                              |                  |             | 0.785939          |              |
| chr10 | q11.21 - q26.3 | SUFU    | suppressor of fused homolog (Drosophila)                                        |                  |             | 0.785939          |              |
| chr10 | q11.21 - q26.3 | TCF7L2  | transcription factor 7-like 2 (T-cell specific, HMG-box)                        |                  |             | 0.785939          |              |
| chr10 | q11.21 - q26.3 | TET1    | tet oncogene 1                                                                  |                  |             | 0.785939          |              |
| chr10 | q11.21 - q26.3 | TLX1    | T-cell leukemia homeobox 1                                                      |                  |             | 0.785939          |              |
| chr10 | q11.21 - q26.3 | VTI1A   | vesicle transport through interaction with t-SNAREs homolog 1A (yeast)          |                  |             | 0.785939          |              |
| chr10 | q22.3 - q26.3  | BMPRI1A | bone morphogenetic protein receptor, type IA similar to ALK-3                   |                  |             | 0.578304          |              |
| chr10 | q22.3 - q26.3  | FAM22A  | family with sequence similarity 22, member A                                    |                  |             | 0.578304          |              |
| chr10 | q22.3 - q26.3  | FAS     | Fas (TNF receptor superfamily, member 6)                                        |                  |             | 0.578304          |              |
| chr10 | q22.3 - q26.3  | FGFR2   | fibroblast growth factor receptor 2                                             |                  |             | 0.578304          |              |
| chr10 | q22.3 - q26.3  | NFKB2   | nuclear factor of kappa light polypeptide gene enhancer in B-cells 2 (p49/p100) |                  |             | 0.578304          |              |
| chr10 | q22.3 - q26.3  | PTEN    | phosphatase and tensin homolog phosphatase and tensin homolog pseudogene 1      |                  |             | 0.578304          |              |
| chr10 | q22.3 - q26.3  | SUFU    | suppressor of fused homolog (Drosophila)                                        |                  |             | 0.578304          |              |
| chr10 | q22.3 - q26.3  | TCF7L2  | transcription factor 7-like 2 (T-cell specific, HMG-box)                        |                  |             | 0.578304          |              |
| chr10 | q22.3 - q26.3  | TLX1    | T-cell leukemia homeobox 1                                                      |                  |             | 0.578304          |              |
| chr10 | q22.3 - q26.3  | VTI1A   | vesicle transport through interaction with t-SNAREs homolog 1A (yeast)          |                  |             | 0.578304          |              |
| chr10 | q11.21 - q22.2 | RET     | ret proto-oncogene                                                              | 0.499694         |             |                   |              |
| chr11 | q21 - q22.2    | BIRC3   | baculoviral IAP repeat-containing 3                                             | 0.899188         |             | 1.654617          |              |
| chr11 | q14.3 - q22.2  | BIRC3   | baculoviral IAP repeat-containing 3                                             |                  |             | 1.472601          |              |
| chr11 | q14.3 - q22.2  | MAML2   | mastermind-like 2 (Drosophila)                                                  |                  |             | 1.472601          |              |
| chr11 | p11.2 - p11.12 | DDB2    | damage-specific DNA binding protein 2, 48kDa                                    | 0.675591         |             | 1.367689          |              |
| chr11 | q14.1 - q14.2  | PICALM  | phosphatidylinositol binding clathrin assembly protein                          |                  |             | 1.233367          |              |
| chr11 | q13.1 - q13.2  | MALAT1  | metastasis associated lung adenocarcinoma transcript 1 (non-protein coding)     | 0.493271         |             | 1.166481          |              |
| chr11 | p15.4 - p15.3  | CARS    | cysteinyl-tRNA synthetase                                                       | 0.475881         |             | 1.142749          |              |
| chr11 | p15.4 - p15.3  | LMO1    | LIM domain only 1 (rhombotin 1)                                                 | 0.475881         |             | 1.142749          |              |
| chr11 | p15.4 - p15.3  | NUP98   | nucleoporin 98kDa                                                               | 0.475881         |             | 1.142749          |              |
| chr11 | q12.1 - q22.2  | BIRC3   | baculoviral IAP repeat-containing 3                                             |                  |             | 0.982337          |              |

**ADDITIONAL TABLE 2: aCGH data of Low- and High-Passage KCI-MENG1 Cells**

| Chr   | CytoBand       | GeneID   | Gene name                                                                                                                                              | Amplification P6 | Deletion P6 | Amplification P86 | Deletion P86 |
|-------|----------------|----------|--------------------------------------------------------------------------------------------------------------------------------------------------------|------------------|-------------|-------------------|--------------|
| chr11 | q12.1 - q22.2  | CCND1    | cyclin D1                                                                                                                                              |                  |             | 0.982337          |              |
| chr11 | q12.1 - q22.2  | CLP1     | CLP1, cleavage and polyadenylation factor I subunit, homolog ( <i>S. cerevisiae</i> )                                                                  |                  |             | 0.982337          |              |
| chr11 | q12.1 - q22.2  | MALAT1   | metastasis associated lung adenocarcinoma transcript 1 (non-protein coding)                                                                            |                  |             | 0.982337          |              |
| chr11 | q12.1 - q22.2  | MAML2    | mastermind-like 2 ( <i>Drosophila</i> )                                                                                                                |                  |             | 0.982337          |              |
| chr11 | q12.1 - q22.2  | MEN1     | multiple endocrine neoplasia I                                                                                                                         |                  |             | 0.982337          |              |
| chr11 | q12.1 - q22.2  | NUMA1    | nuclear mitotic apparatus protein 1                                                                                                                    |                  |             | 0.982337          |              |
| chr11 | q12.1 - q22.2  | PICALM   | phosphatidylinositol binding clathrin assembly protein                                                                                                 |                  |             | 0.982337          |              |
| chr11 | q12.1 - q22.2  | SDHAF2   | chromosome 11 open reading frame 79                                                                                                                    |                  |             | 0.982337          |              |
| chr11 | p15.4 - p15.3  | LMO1     | LIM domain only 1 (rhombotin 1)                                                                                                                        |                  |             | 0.914575          |              |
| chr11 | p15.4 - p11.12 | CARS     | cysteinyl-tRNA synthetase                                                                                                                              |                  |             | 0.844095          |              |
| chr11 | p15.4 - p11.12 | CREB3L1  | collagen, type I, alpha 1                                                                                                                              |                  |             | 0.844095          |              |
| chr11 | p15.4 - p11.12 | DDB2     | damage-specific DNA binding protein 2, 48kDa                                                                                                           |                  |             | 0.844095          |              |
| chr11 | p15.4 - p11.12 | EXT2     | exostoses (multiple) 2                                                                                                                                 |                  |             | 0.844095          |              |
| chr11 | p15.4 - p11.12 | FANCF    | Fanconi anemia, complementation group F                                                                                                                |                  |             | 0.844095          |              |
| chr11 | p15.4 - p11.12 | LMO1     | LIM domain only 1 (rhombotin 1)                                                                                                                        |                  |             | 0.844095          |              |
| chr11 | p15.4 - p11.12 | LMO2     | LIM domain only 2 (rhombotin-like 1)                                                                                                                   |                  |             | 0.844095          |              |
| chr11 | p15.4 - p11.12 | NUP98    | nucleoporin 98kDa                                                                                                                                      |                  |             | 0.844095          |              |
| chr11 | p15.4 - p11.12 | WT1      | Wilms tumor 1                                                                                                                                          |                  |             | 0.844095          |              |
| chr11 | q24.3 - q25    | FLI1     | Friend leukemia virus integration 1                                                                                                                    |                  |             | 0.578688          |              |
| chr11 | p12 - p11.2    | EXT2     | exostoses (multiple) 2                                                                                                                                 |                  |             | 0.557571          |              |
| chr11 | p15.2 - p14.3  | FANCF    | Fanconi anemia, complementation group F                                                                                                                |                  |             | 0.536336          |              |
| chr11 | q22.2 - q25    | ARHGEF12 | Rho guanine nucleotide exchange factor (GEF) 12                                                                                                        |                  |             | 0.375304          |              |
| chr11 | q22.2 - q25    | ATM      | similar to Serine-protein kinase ATM (Ataxia telangiectasia mutated) (A-T, mutated) ataxia telangiectasia mutated                                      |                  |             | 0.375304          |              |
| chr11 | q22.2 - q25    | BIRC3    | baculoviral IAP repeat-containing 3                                                                                                                    |                  |             | 0.375304          |              |
| chr11 | q22.2 - q25    | CBL      | Cas-Br-M (murine) ecotropic retroviral transforming sequence                                                                                           |                  |             | 0.375304          |              |
| chr11 | q22.2 - q25    | DDX10    | DEAD (Asp-Glu-Ala-Asp) box polypeptide 10                                                                                                              |                  |             | 0.375304          |              |
| chr11 | q22.2 - q25    | DDX6     | DEAD (Asp-Glu-Ala-Asp) box polypeptide 6                                                                                                               |                  |             | 0.375304          |              |
| chr11 | q22.2 - q25    | FLI1     | Friend leukemia virus integration 1                                                                                                                    |                  |             | 0.375304          |              |
| chr11 | q22.2 - q25    | MLL      | myeloid/lymphoid or mixed-lineage leukemia (trithorax homolog, <i>Drosophila</i> )                                                                     |                  |             | 0.375304          |              |
| chr11 | q22.2 - q25    | PAFAH1B2 | platelet-activating factor acetylhydrolase, isoform Ib, subunit 2 (30kDa)                                                                              |                  |             | 0.375304          |              |
| chr11 | q22.2 - q25    | PCSK7    | proprotein convertase subtilisin/kexin type 7 pseudogene proprotein convertase subtilisin/kexin type 7                                                 |                  |             | 0.375304          |              |
| chr11 | q22.2 - q25    | POU2AF1  | PMS2 postmeiotic segregation increased 2 ( <i>S. cerevisiae</i> )                                                                                      |                  |             | 0.375304          |              |
| chr11 | q22.2 - q25    | SDHD     | similar to succinate dehydrogenase complex, subunit D, integral membrane protein succinate dehydrogenase complex, subunit D, integral membrane protein |                  |             | 0.375304          |              |
| chr11 | q22.2 - q25    | ZBTB16   | zinc finger and BTB domain containing 16                                                                                                               |                  |             | 0.375304          |              |
| chr11 | q14.1- q22.2   | BIRC3    | baculoviral IAP repeat-containing 3                                                                                                                    | 0.709864         |             |                   |              |



**ADDITIONAL TABLE 2: aCGH data of Low- and High-Passage KCI-MENG1 Cells**

| Chr   | CytoBand       | GeneID | Gene name                                                                                                        | Amplification P6 | Deletion P6 | Amplification P86 | Deletion P86 |
|-------|----------------|--------|------------------------------------------------------------------------------------------------------------------|------------------|-------------|-------------------|--------------|
| chr11 | q14.1 - q22.2  | MAML2  | mastermind-like 2 (Drosophila)                                                                                   | 0.709864         |             |                   |              |
| chr11 | q14.1 - q22.2  | PICALM | phosphatidylinositol binding clathrin assembly protein                                                           | 0.709864         |             |                   |              |
| chr11 | q14.1 - q14.3  | PICALM | phosphatidylinositol binding clathrin assembly protein                                                           | 0.48336          |             |                   |              |
| chr12 | q11 - q13.2    | ARID2  | AT rich interactive domain 2 (ARID, RFX-like)                                                                    | 0.458262         |             | 1.178124          |              |
| chr12 | q11 - q13.2    | ATF1   | activating transcription factor 1                                                                                | 0.458262         |             | 1.178124          |              |
| chr12 | q11 - q13.2    | HOXC11 | homeobox C11                                                                                                     | 0.458262         |             | 1.178124          |              |
| chr12 | q11 - q13.2    | HOXC13 | homeobox C13                                                                                                     | 0.458262         |             | 1.178124          |              |
| chr12 | q11 - q13.2    | MLL2   | myeloid/lymphoid or mixed-lineage leukemia 2                                                                     | 0.458262         |             | 1.178124          |              |
| chr12 | p12.1 - p11.1  | KRAS   | v-Ki-ras2 Kirsten rat sarcoma viral oncogene homolog                                                             |                  |             | 0.823773          |              |
| chr12 | q11 - q24.33   | ALDH2  | aldehyde dehydrogenase 2 family (mitochondrial)                                                                  |                  |             | 0.670705          |              |
| chr12 | q11 - q24.33   | ARID2  | AT rich interactive domain 2 (ARID, RFX-like)                                                                    |                  |             | 0.670705          |              |
| chr12 | q11 - q24.33   | ATF1   | activating transcription factor 1                                                                                |                  |             | 0.670705          |              |
| chr12 | q11 - q24.33   | BCL7A  | B-cell CLL/lymphoma 7A                                                                                           |                  |             | 0.670705          |              |
| chr12 | q11 - q24.33   | BTG1   | B-cell translocation gene 1, anti-proliferative                                                                  |                  |             | 0.670705          |              |
| chr12 | q11 - q24.33   | CDK4   | cyclin-dependent kinase 4                                                                                        |                  |             | 0.670705          |              |
| chr12 | q11 - q24.33   | DDIT3  | DNA-damage-inducible transcript 3                                                                                |                  |             | 0.670705          |              |
| chr12 | q11 - q24.33   | HMGA2  | high mobility group AT-hook 2                                                                                    |                  |             | 0.670705          |              |
| chr12 | q11 - q24.33   | HNF1A  | HNF1 homeobox A                                                                                                  |                  |             | 0.670705          |              |
| chr12 | q11 - q24.33   | HOXC11 | homeobox C11                                                                                                     |                  |             | 0.670705          |              |
| chr12 | q11 - q24.33   | HOXC13 | homeobox C13                                                                                                     |                  |             | 0.670705          |              |
| chr12 | q11 - q24.33   | LRIG3  | leucine-rich repeats and immunoglobulin-like domains 3                                                           |                  |             | 0.670705          |              |
| chr12 | q11 - q24.33   | MDM2   | Mdm2 p53 binding protein homolog (mouse)                                                                         |                  |             | 0.670705          |              |
| chr12 | q11 - q24.33   | MLL2   | myeloid/lymphoid or mixed-lineage leukemia 2                                                                     |                  |             | 0.670705          |              |
| chr12 | q11 - q24.33   | NACA   | nascent polypeptide-associated complex alpha subunit                                                             |                  |             | 0.670705          |              |
| chr12 | q11 - q24.33   | PTPN11 | protein tyrosine phosphatase, non-receptor type 11 similar to protein tyrosine phosphatase, non-receptor type 11 |                  |             | 0.670705          |              |
| chr12 | q11 - q24.33   | WIF1   | WNT inhibitory factor 1                                                                                          |                  |             | 0.670705          |              |
| chr12 | p13.31         | ZNF384 | zinc finger protein 384                                                                                          |                  |             | 0.55643           |              |
| chr12 | q13.3 - q24.33 | ALDH2  | aldehyde dehydrogenase 2 family (mitochondrial)                                                                  |                  |             | 0.550591          |              |
| chr12 | q13.3 - q24.33 | BCL7A  | B-cell CLL/lymphoma 7A                                                                                           |                  |             | 0.550591          |              |
| chr12 | q13.3 - q24.33 | BTG1   | B-cell translocation gene 1, anti-proliferative                                                                  |                  |             | 0.550591          |              |
| chr12 | q13.3 - q24.33 | CDK4   | cyclin-dependent kinase 4                                                                                        |                  |             | 0.550591          |              |
| chr12 | q13.3 - q24.33 | DDIT3  | DNA-damage-inducible transcript 3                                                                                |                  |             | 0.550591          |              |
| chr12 | q13.3 - q24.33 | HMGA2  | high mobility group AT-hook 2                                                                                    |                  |             | 0.550591          |              |
| chr12 | q13.3 - q24.33 | HNF1A  | HNF1 homeobox A                                                                                                  |                  |             | 0.550591          |              |
| chr12 | q13.3 - q24.33 | LRIG3  | leucine-rich repeats and immunoglobulin-like domains 3                                                           |                  |             | 0.550591          |              |
| chr12 | q13.3 - q24.33 | MDM2   | Mdm2 p53 binding protein homolog (mouse)                                                                         |                  |             | 0.550591          |              |
| chr12 | q13.3 - q24.33 | NACA   | nascent polypeptide-associated complex alpha subunit                                                             |                  |             | 0.550591          |              |
| chr12 | q13.3 - q24.33 | PTPN11 | protein tyrosine phosphatase, non-receptor type 11 similar to protein tyrosine phosphatase, non-receptor type 11 |                  |             | 0.550591          |              |
| chr12 | q13.3 - q24.33 | WIF1   | WNT inhibitory factor 1                                                                                          |                  |             | 0.550591          |              |
| chr13 | q21.1 - q34    | ERCC5  | excision repair cross-complementing rodent repair deficiency, complementation group 5                            |                  |             | 0.633559          |              |

**ADDITIONAL TABLE 2: aCGH data of Low- and High-Passage KCI-MENG1 Cells**

| Chr   | CytoBand      | GeneID   | Gene name                                                                             | Amplification P6 | Deletion P6 | Amplification P86 | Deletion P86 |
|-------|---------------|----------|---------------------------------------------------------------------------------------|------------------|-------------|-------------------|--------------|
| chr14 | q23.3         | GPHN     | gephyrin                                                                              |                  | -0.714782   |                   | -0.656267    |
| chr15 | q26.1 - q26.3 | BLM      | Bloom syndrome, RecQ helicase-like                                                    | 0.490823         |             | 1.163907          |              |
| chr15 | q26.1 - q26.3 | CRTC3    | CREB regulated transcription coactivator 3                                            | 0.490823         |             | 1.163907          |              |
| chr15 | q26.1 - q26.3 | IDH2     | isocitrate dehydrogenase 2 (NADP+), mitochondrial                                     | 0.490823         |             | 1.163907          |              |
| chr15 | q14           | C15orf55 | chromosome 15 open reading frame 55                                                   | 0.321231         |             | 0.935             |              |
| chr15 | q25.1 - q26.1 | NTRK3    | neurotrophic tyrosine kinase, receptor, type 3                                        |                  |             | 0.867012          |              |
| chr15 | q11.1 - q26.3 | BLM      | Bloom syndrome, RecQ helicase-like                                                    |                  |             | 0.727721          |              |
| chr15 | q11.1 - q26.3 | BUB1B    | budding uninhibited by benzimidazoles 1 homolog beta (yeast)                          |                  |             | 0.727721          |              |
| chr15 | q11.1 - q26.3 | C15orf55 | chromosome 15 open reading frame 55                                                   |                  |             | 0.727721          |              |
| chr15 | q11.1 - q26.3 | CASC5    | cancer susceptibility candidate 5                                                     |                  |             | 0.727721          |              |
| chr15 | q11.1 - q26.3 | CRTC3    | CREB regulated transcription coactivator 3                                            |                  |             | 0.727721          |              |
| chr15 | q11.1 - q26.3 | FLJ27352 | hypothetical LOC145788                                                                |                  |             | 0.727721          |              |
| chr15 | q11.1 - q26.3 | HMG2P46  | high mobility group AT-hook 2                                                         |                  |             | 0.727721          |              |
| chr15 | q11.1 - q26.3 | IDH2     | isocitrate dehydrogenase 2 (NADP+), mitochondrial                                     |                  |             | 0.727721          |              |
| chr15 | q11.1 - q26.3 | NTRK3    | neurotrophic tyrosine kinase, receptor, type 3                                        |                  |             | 0.727721          |              |
| chr15 | q11.1 - q26.3 | PML      | promyelocytic leukemia similar to promyelocytic leukemia protein isoform 1            |                  |             | 0.727721          |              |
| chr15 | q11.1 - q26.3 | TCF12    | transcription factor 12                                                               |                  |             | 0.727721          |              |
| chr15 | q11.2 - q24.2 | BUB1B    | budding uninhibited by benzimidazoles 1 homolog beta (yeast)                          |                  |             | 0.555837          |              |
| chr15 | q11.2 - q24.2 | C15orf55 | chromosome 15 open reading frame 55                                                   |                  |             | 0.555837          |              |
| chr15 | q11.2 - q24.2 | CASC5    | cancer susceptibility candidate 5                                                     |                  |             | 0.555837          |              |
| chr15 | q11.2 - q24.2 | FLJ27352 | hypothetical LOC145788                                                                |                  |             | 0.555837          |              |
| chr15 | q11.2 - q24.2 | HMG2P46  | high mobility group AT-hook 2                                                         |                  |             | 0.555837          |              |
| chr15 | q11.2 - q24.2 | PML      | promyelocytic leukemia similar to promyelocytic leukemia protein isoform 1            |                  |             | 0.555837          |              |
| chr15 | q11.2 - q24.2 | TCF12    | transcription factor 12                                                               |                  |             | 0.555837          |              |
| chr15 | q24.2 - q26.3 | BLM      | Bloom syndrome, RecQ helicase-like                                                    | 0.37759          |             |                   |              |
| chr15 | q24.2 - q26.3 | CRTC3    | CREB regulated transcription coactivator 3                                            | 0.37759          |             |                   |              |
| chr15 | q24.2 - q26.3 | IDH2     | isocitrate dehydrogenase 2 (NADP+), mitochondrial                                     | 0.37759          |             |                   |              |
| chr15 | q24.2 - q26.3 | NTRK3    | neurotrophic tyrosine kinase, receptor, type 3                                        | 0.37759          |             |                   |              |
| chr16 | p13.11        | MYH11    | myosin, heavy chain 11, smooth muscle                                                 |                  |             | 0.815365          |              |
| chr16 | p13.3 - p11.1 | C16orf75 | chromosome 16 open reading frame 75                                                   |                  |             | 0.503333          |              |
| chr16 | p13.3 - p11.1 | CIITA    | class II, major histocompatibility complex, transactivator                            |                  |             | 0.503333          |              |
| chr16 | p13.3 - p11.1 | CREBBP   | CREB binding protein                                                                  |                  |             | 0.503333          |              |
| chr16 | p13.3 - p11.1 | ERCC4    | excision repair cross-complementing rodent repair deficiency, complementation group 4 |                  |             | 0.503333          |              |
| chr16 | p13.3 - p11.1 | FUS      | fusion (involved in t(1216) in malignant liposarcoma)                                 |                  |             | 0.503333          |              |
| chr16 | p13.3 - p11.1 | IL21R    | interleukin 21 receptor                                                               |                  |             | 0.503333          |              |
| chr16 | p13.3 - p11.1 | MYH11    | myosin, heavy chain 11, smooth muscle                                                 |                  |             | 0.503333          |              |
| chr16 | p13.3 - p11.1 | PALB2    | partner and localizer of BRCA2                                                        |                  |             | 0.503333          |              |
| chr16 | p13.3 - p11.1 | RUNDC2A  | ribophorin I                                                                          |                  |             | 0.503333          |              |
| chr16 | p13.3 - p11.1 | SNX29    | sorting nexin 29                                                                      |                  |             | 0.503333          |              |
| chr16 | p13.3 - p11.1 | SOCS1    | suppressor of cytokine signaling 1                                                    |                  |             | 0.503333          |              |

**ADDITIONAL TABLE 2: aCGH data of Low- and High-Passage KCI-MENG1 Cells**

| Chr   | CytoBand      | GeneID   | Gene name                                                                                                                                                                                           | Amplification P6 | Deletion P6 | Amplification P86 | Deletion P86 |
|-------|---------------|----------|-----------------------------------------------------------------------------------------------------------------------------------------------------------------------------------------------------|------------------|-------------|-------------------|--------------|
| chr16 | p13.3 - p11.1 | TNFRSF17 | tumor necrosis factor receptor superfamily, member 17                                                                                                                                               |                  |             | 0.503333          |              |
| chr16 | p13.3 - p11.1 | TSC2     | tuberous sclerosis 2                                                                                                                                                                                |                  |             | 0.503333          |              |
| chr16 | q11.2 - q24.3 | CBFA2T3  | cancer susceptibility candidate 5                                                                                                                                                                   |                  |             | 0.49455           |              |
| chr16 | q11.2 - q24.3 | CBFB     | core-binding factor, beta subunit                                                                                                                                                                   |                  |             | 0.49455           |              |
| chr16 | q11.2 - q24.3 | CDH1     | cadherin 1, type 1, E-cadherin (epithelial)                                                                                                                                                         |                  |             | 0.49455           |              |
| chr16 | q11.2 - q24.3 | CDH11    | cadherin 11, type 2, OB-cadherin (osteoblast)                                                                                                                                                       |                  |             | 0.49455           |              |
| chr16 | q11.2 - q24.3 | CYLD     | cylandromatosis (turban tumor syndrome)                                                                                                                                                             |                  |             | 0.49455           |              |
| chr16 | q11.2 - q24.3 | FANCA    | Fanconi anemia, complementation group A                                                                                                                                                             |                  |             | 0.49455           |              |
| chr16 | q11.2 - q24.3 | HERPUD1  | H3 histone, family 3B (H3.3B) H3 histone, family 3A pseudogene                                                                                                                                      |                  |             | 0.49455           |              |
| chr16 | q11.2 - q24.3 | MAF      | v-maf musculoaponeurotic fibrosarcoma oncogene homolog (avian)                                                                                                                                      |                  |             | 0.49455           |              |
| chr17 | p13.3 - p11.1 | FLCN     | folliculin                                                                                                                                                                                          |                  |             | 0.534252          |              |
| chr17 | p13.3 - p11.1 | GAS7     | growth arrest-specific 7                                                                                                                                                                            |                  |             | 0.534252          |              |
| chr17 | p13.3 - p11.1 | MAP2K4   | mitogen-activated protein kinase kinase 4                                                                                                                                                           |                  |             | 0.534252          |              |
| chr17 | p13.3 - p11.1 | PER1     | period homolog 1 (Drosophila)                                                                                                                                                                       |                  |             | 0.534252          |              |
| chr17 | p13.3 - p11.1 | RABEP1   | rabaptin, RAB GTPase binding effector protein 1                                                                                                                                                     |                  |             | 0.534252          |              |
| chr17 | p13.3 - p11.1 | SPECC1   | suppressor of cytokine signaling 1                                                                                                                                                                  |                  |             | 0.534252          |              |
| chr17 | p13.3 - p11.1 | TP53     | tumor protein p53                                                                                                                                                                                   |                  |             | 0.534252          |              |
| chr17 | p13.3 - p11.1 | USP6     | ubiquitin specific peptidase 6 (Tre-2 oncogene)                                                                                                                                                     |                  |             | 0.534252          |              |
| chr17 | p13.3 - p11.1 | YWHAE    | similar to 14-3-3 protein epsilon (14-3-3E) (Mitochondrial import stimulation factor L subunit) (MSF L) tyrosine 3-monooxygenase/tryptophan 5-monooxygenase activation protein, epsilon polypeptide |                  |             | 0.534252          |              |
| chr17 | q11.1 - q25.3 | ASPCR1   | aryl hydrocarbon receptor nuclear translocator                                                                                                                                                      |                  |             | 0.514077          |              |
| chr17 | q11.1 - q25.3 | BRCA1    | breast cancer 1, early onset                                                                                                                                                                        |                  |             | 0.514077          |              |
| chr17 | q11.1 - q25.3 | BRIP1    | BRCA1 interacting protein C-terminal helicase 1                                                                                                                                                     |                  |             | 0.514077          |              |
| chr17 | q11.1 - q25.3 | CANT1    | calcium activated nucleotidase 1                                                                                                                                                                    |                  |             | 0.514077          |              |
| chr17 | q11.1 - q25.3 | CD79B    | CD79b molecule, immunoglobulin-associated beta                                                                                                                                                      |                  |             | 0.514077          |              |
| chr17 | q11.1 - q25.3 | CDK12    | Cdc2-related kinase, arginine/serine-rich                                                                                                                                                           |                  |             | 0.514077          |              |
| chr17 | q11.1 - q25.3 | CLTC     | clathrin, heavy chain (Hc)                                                                                                                                                                          |                  |             | 0.514077          |              |
| chr17 | q11.1 - q25.3 | COL1A1   | collagen, type I, alpha 1                                                                                                                                                                           |                  |             | 0.514077          |              |
| chr17 | q11.1 - q25.3 | DDX5     | DEAD (Asp-Glu-Ala-Asp) box polypeptide 5                                                                                                                                                            |                  |             | 0.514077          |              |
| chr17 | q11.1 - q25.3 | ERBB2    | v-erb-b2 erythroblastic leukemia viral oncogene homolog 2, neuro/glioblastoma derived oncogene homolog (avian)                                                                                      |                  |             | 0.514077          |              |
| chr17 | q11.1 - q25.3 | ETV4     | ets variant 4                                                                                                                                                                                       |                  |             | 0.514077          |              |
| chr17 | q11.1 - q25.3 | HLF      | hepatic leukemia factor                                                                                                                                                                             |                  |             | 0.514077          |              |
| chr17 | q11.1 - q25.3 | LASP1    | LIM and SH3 protein 1                                                                                                                                                                               |                  |             | 0.514077          |              |
| chr17 | q11.1 - q25.3 | MLLT6    | myeloid/lymphoid or mixed-lineage leukemia (trithorax homolog, Drosophila) translocated to, 6                                                                                                       |                  |             | 0.514077          |              |
| chr17 | q11.1 - q25.3 | MSI2     | musashi homolog 2 (Drosophila)                                                                                                                                                                      |                  |             | 0.514077          |              |
| chr17 | q11.1 - q25.3 | NF1      | neurofibromin 1                                                                                                                                                                                     |                  |             | 0.514077          |              |
| chr17 | q11.1 - q25.3 | PRKAR1A  | perforin 1 (pore forming protein)                                                                                                                                                                   |                  |             | 0.514077          |              |
| chr17 | q11.1 - q25.3 | RARA     | retinoic acid receptor, alpha                                                                                                                                                                       |                  |             | 0.514077          |              |

**ADDITIONAL TABLE 2: aCGH data of Low- and High-Passage KCI-MENG1 Cells**

| Chr   | CytoBand        | GeneID  | Gene name                                                                                                                                              | Amplification P6 | Deletion P6 | Amplification P86 | Deletion P86 |
|-------|-----------------|---------|--------------------------------------------------------------------------------------------------------------------------------------------------------|------------------|-------------|-------------------|--------------|
| chr17 | q11.1 - q25.3   | RNF213  | ring finger protein 213                                                                                                                                |                  |             | 0.514077          |              |
| chr17 | q11.1 - q25.3   | SEPT9   | similar to succinate dehydrogenase complex, subunit D, integral membrane protein succinate dehydrogenase complex, subunit D, integral membrane protein |                  |             | 0.514077          |              |
| chr17 | q11.1 - q25.3   | SRSF2   | SLIT-ROBO Rho GTPase activating protein 3                                                                                                              |                  |             | 0.514077          |              |
| chr17 | q11.1 - q25.3   | SUZ12   | suppressor of zeste 12 homolog (Drosophila)                                                                                                            |                  |             | 0.514077          |              |
| chr17 | q11.1 - q25.3   | TAF15   | TAF15 RNA polymerase II, TATA box binding protein (TBP)-associated factor, 68kDa                                                                       |                  |             | 0.514077          |              |
| chr19 | q13.41 - q13.43 | TFPT    | TCF3 (E2A) fusion partner (in childhood Leukemia)                                                                                                      |                  |             | 0.574435          |              |
| chr19 | q13.41 - q13.43 | ZNF331  | zinc finger protein 331                                                                                                                                |                  |             | 0.574435          |              |
| chr19 | q11 - q13.43    | AKT2    | v-akt murine thymoma viral oncogene homolog 2                                                                                                          |                  |             | 0.425134          |              |
| chr19 | q11 - q13.43    | BCL3    | B-cell CLL/lymphoma 3                                                                                                                                  |                  |             | 0.425134          |              |
| chr19 | q11 - q13.43    | CBLC    | Cas-Br-M (murine) ecotropic retroviral transforming sequence c                                                                                         |                  |             | 0.425134          |              |
| chr19 | q11 - q13.43    | CCNE1   | cyclin E1                                                                                                                                              |                  |             | 0.425134          |              |
| chr19 | q11 - q13.43    | CD79A   | CD79a molecule, immunoglobulin-associated alpha                                                                                                        |                  |             | 0.425134          |              |
| chr19 | q11 - q13.43    | CEBPA   | CCAAT/enhancer binding protein (C/EBP), alpha                                                                                                          |                  |             | 0.425134          |              |
| chr19 | q11 - q13.43    | CIC     | capicua homolog (Drosophila)                                                                                                                           |                  |             | 0.425134          |              |
| chr19 | q11 - q13.43    | ERCC2   | excision repair cross-complementing rodent repair deficiency, complementation group 2                                                                  |                  |             | 0.425134          |              |
| chr19 | q11 - q13.43    | KLK2    | kallikrein-related peptidase 2                                                                                                                         |                  |             | 0.425134          |              |
| chr19 | q11 - q13.43    | PPP2R1A | peroxisome proliferator-activated receptor gamma                                                                                                       |                  |             | 0.425134          |              |
| chr19 | q11 - q13.43    | TFPT    | TCF3 (E2A) fusion partner (in childhood Leukemia)                                                                                                      |                  |             | 0.425134          |              |
| chr19 | q11 - q13.43    | ZNF331  | zinc finger protein 331                                                                                                                                |                  |             | 0.425134          |              |
| chr19 | p13.3 - p11     | BRD4    | bromodomain containing 4                                                                                                                               |                  |             | 0.411723          |              |
| chr19 | p13.3 - p11     | CRTC1   | CREB regulated transcription coactivator 1                                                                                                             |                  |             | 0.411723          |              |
| chr19 | p13.3 - p11     | DNM2    | dynamamin 2                                                                                                                                            |                  |             | 0.411723          |              |
| chr19 | p13.3 - p11     | ELL     | elongation factor RNA polymerase II                                                                                                                    |                  |             | 0.411723          |              |
| chr19 | p13.3 - p11     | JAK3    | Janus kinase 3                                                                                                                                         |                  |             | 0.411723          |              |
| chr19 | p13.3 - p11     | LYL1    | lymphoblastic leukemia derived sequence 1                                                                                                              |                  |             | 0.411723          |              |
| chr19 | p13.3 - p11     | SMARCA4 | SWI/SNF Related, Matrix Associated, Actin Dependent Regulator of Chromatin, Subfamily A, Member 4                                                      |                  |             | 0.411723          |              |
| chr19 | p13.3 - p11     | TPM4    | tropomyosin 4                                                                                                                                          |                  |             | 0.411723          |              |
| chr19 | p13.3           | STK11   | serine/threonine kinase 11                                                                                                                             |                  | -1.376387   |                   | -3.097343    |
| chr20 | q13.2 - q13.33  | GNAS    | GNAS complex locus                                                                                                                                     | 0.470244         |             | 1.148625          |              |
| chr20 | q13.2 - q13.33  | SS18L1  | synovial sarcoma translocation gene on chromosome 18-like 1                                                                                            | 0.470244         |             | 1.148625          |              |
| chr20 | q11.21 - q13.33 | ASXL1   | additional sex combs like 1 (Drosophila)                                                                                                               | 0.331638         |             | 0.958835          |              |
| chr20 | q11.21 - q13.33 | GNAS    | GNAS complex locus                                                                                                                                     | 0.331638         |             | 0.958835          |              |
| chr20 | q11.21 - q13.33 | MAFB    | v-maf musculoaponeurotic fibrosarcoma oncogene homolog B (avian)                                                                                       | 0.331638         |             | 0.958835          |              |
| chr20 | q11.21 - q13.33 | SDC4    | syndecan 4                                                                                                                                             | 0.331638         |             | 0.958835          |              |
| chr20 | q11.21 - q13.33 | SS18L1  | synovial sarcoma translocation gene on chromosome 18-like 1                                                                                            | 0.331638         |             | 0.958835          |              |
| chr20 | q11.21 - q13.33 | TOP1    | topoisomerase (DNA) I                                                                                                                                  | 0.331638         |             | 0.958835          |              |
| chr20 | q11.21 - q13.2  | ASXL1   | additional sex combs like 1 (Drosophila)                                                                                                               |                  |             | 0.859745          |              |

**ADDITIONAL TABLE 2: aCGH data of Low- and High-Passage KCI-MENG1 Cells**

| Chr   | CytoBand        | GeneID  | Gene name                                                                                            | Amplification P6 | Deletion P6 | Amplification P86 | Deletion P86 |
|-------|-----------------|---------|------------------------------------------------------------------------------------------------------|------------------|-------------|-------------------|--------------|
| chr20 | q11.21 - q13.2  | MAFB    | v-maf musculoaponeurotic fibrosarcoma oncogene homolog B (avian)                                     |                  |             | 0.859745          |              |
| chr20 | q11.21 - q13.2  | SDC4    | syndecan 4                                                                                           |                  |             | 0.859745          |              |
| chr20 | q11.21 - q13.2  | TOP1    | topoisomerase (DNA) I                                                                                |                  |             | 0.859745          |              |
| chrX  | p11.22 - p11.21 | KDM5C   | lysine (K)-specific demethylase 5C                                                                   |                  |             | 0.90204           |              |
| chrX  | p11.22 - p11.21 | SSX2    | synovial sarcoma, X breakpoint 2 synovial sarcoma, X breakpoint 5, synovial sarcoma, X breakpoint 2B |                  |             | 0.90204           |              |
| chrX  | p22.33 - p11.1  | BCOR    | BCL6 co-repressor                                                                                    |                  |             | 0.58112           |              |
| chrX  | p22.33 - p11.1  | CRLF2   | cytokine receptor-like factor 2                                                                      |                  |             | 0.58112           |              |
| chrX  | p22.33 - p11.1  | GATA1   | GATA binding protein 1 (globin transcription factor 1)                                               |                  |             | 0.58112           |              |
| chrX  | p22.33 - p11.1  | KDM5C   | lysine (K)-specific demethylase 5C                                                                   |                  |             | 0.58112           |              |
| chrX  | p22.33 - p11.1  | KDM6A   | lysine (K)-specific demethylase 6A                                                                   |                  |             | 0.58112           |              |
| chrX  | p22.33 - p11.1  | P2RY8   | purinergic receptor P2Y, G-protein coupled, 8                                                        |                  |             | 0.58112           |              |
| chrX  | p22.33 - p11.1  | SSX1    | synovial sarcoma, X breakpoint 8 synovial sarcoma, X breakpoint 1                                    |                  |             | 0.58112           |              |
| chrX  | p22.33 - p11.1  | SSX2    | synovial sarcoma, X breakpoint 2 synovial sarcoma, X breakpoint 5, synovial sarcoma, X breakpoint 2B |                  |             | 0.58112           |              |
| chrX  | p22.33 - p11.1  | SSX4    | synovial sarcoma, X breakpoint 4 synovial sarcoma, X breakpoint 4B                                   |                  |             | 0.58112           |              |
| chrX  | p22.33 - p11.1  | TFE3    | transcription factor binding to IGHM enhancer 3                                                      |                  |             | 0.58112           |              |
| chrX  | p22.33 - p11.1  | WAS     | Wiskott-Aldrich syndrome (eczema-thrombocytopenia)                                                   |                  |             | 0.58112           |              |
| chrX  | p22.33 - p11.1  | ZRSR2   | zinc finger (CCCH type), RNA-binding motif and serine/arginine rich 2                                |                  |             | 0.58112           |              |
| chrX  | q11.1 - q12     | FAM123B | enhancer of zeste homolog 2 (Drosophila)                                                             |                  |             | 0.366791          |              |
| chrX  | q11.1 - q12     | MSN     | moesin                                                                                               |                  |             | 0.366791          |              |
| chrX  | p11.22 - p11.1  | KDM5C   | lysine (K)-specific demethylase 5C                                                                   | 0.301484         |             |                   |              |
| chrX  | p11.22 - p11.1  | SSX2    | synovial sarcoma, X breakpoint 2 synovial sarcoma, X breakpoint 5, synovial sarcoma, X breakpoint 2B | 0.301484         |             |                   |              |
